# Supplementary material for: A Phylogenetic Analysis of the Genus Fragaria (Strawberry) Using Intron-Containing Sequence from the ADH-1 Gene
Source: PLoS One. 2014 Jul 31;9(7):e102237. doi: 10.1371/journal.pone.0102237 (PMC4117466; doi:10.1371/journal.pone.0102237)
Supplement: Table S1 — Germplasm accessions used in the phylogenetic study. 1. Accessions with CFRA prefixes were obtained from the USDA National Clonal Germplasm Repository (NCGR) in Corvallis, Oregon. F. vesca cultivar ‘Yellow Wonder’ was initially purchased as seed from W. Atlee Burpee and Company, Warminster, Pennsylvania, and was subsequently seed propagated through natural self-pollination at the University of New Hampshire. SIB3 was obtained as seed from Garrett Crow, University of New Hampshire. Accessions U2A and BC21 were collected from the wild as runner plants by T. Davis. Leaf samples for DNA extractions from all accessions with GS prefixes were obtained from Günter Staudt, Merzhausen, Germany. 2. The accessions listed as F. vesca subsp. bracteata were collected within the range of this subspecies, as delineated by Staudt (1999), but have not been definitively typed to subspecies. (XLSX) [file pone.0102237.s001.xlsx]

## Sheet: Sheet1
Table S1 Germplasm accessions used in the phylogenetic study
SPECIES	ACCESSION NUMBER	PI NUMBER.	COLLECTION SITE	SOURCE1
Diploids
F. bucharica Losinsk.	CFRA 520	PI 551851	Pakistan	NCGR
	ST 4952		Ushu Valley, Pakistan	G. Staudt
	ST 93, 2-1		N. Kagan, Pakistan	G. Staudt
F. daltoniana J. Gay	ST 4949		Nepal	G. Staudt
F. nubicola (Hook. f.) Lindl. ex Lacaita	ST 96,4-1		Yadong, Xizang, China	G. Staudt
F. iinumae Makino	CFRA 377	PI 551751	Japan	NCGR
	CFRA 1849	PI 637963	Japan	T. Davis
	CFRA 1853	PI 637967	Japan	T. Davis
	ST 95,6		Japan	G. Staudt
F. mandshurica Staudt	ST 99,2-4		N. Changai Mtns., Mongolia	G. Staudt
	ST 20,1-3		Jakutzk, Russia	G. Staudt
F. nilgerrensis Schltdl. ex J. Gay	CFRA 1223	PI 616602	Germany	NCGR
F. vesca L. subsp. vesca	‘Yellow Wonder’ (YW)		European cultivar	Burpee
	ST 97,6		Kuban area, Russia	G. Staudt
	ST 95,9		Siberia, Russia	G. Staudt
	CFRA 282	PI 551649	Poland	NCGR
	ST 4959		Not determinable	G. Staudt
F. vesca subsp. americana (Porter) Staudt	‘Pawtuckaway’ (PAWT)	PI657856	Nottingham, NH	T. Davis
F. vesca subsp. bracteata (A. Heller) Staudt2	U2A		Ukiah, California	T. Davis
	BC21		British Columbia	T. Davis
F. viridis Weston	CFRA 341	PI 551742	Germany	NCGR
	ST 4942		Irkutzk, Russia	G. Staudt
F. nipponica Makino	ST 96,7-4		Hokkaido, Japan	G. Staudt
	CFRA 1009	PI 616506	Honshu, Japan	NCGR
F. pentaphylla Losinsk.	ST 92,1-5		Wolong, Sichuan, China	G. Staudt
	ST 4973		Gyala Peri, Xizang, China	G. Staudt
Tetraploids
F. corymbosa Losinsk.	ST 96, 18-3		Changbai Shan, Jilin, China	G. Staudt
F. gracilis Losinsk.	ST 97,7-2		Huzhu Co., Qinghai, China	G. Staudt
F. moupinensis (Franch.) Cardot	ST 3988		Senjogahara, Tochigi, Japan	G. Staudt
F. orientalis Losinsk.	ST 95		Not determinable	G. Staudt
F. tibetica Staudt & Dickoré	ST 99,1-5		Nangxian-Mainling, Xizang	G. Staudt
	ST 4972		Everest, Xizang, China	G. Staudt
Hexaploid
F. moschata Weston	CFRA 157	PI 551550	Europe	NCGR
Octoploids
F. chiloensis L.) Mill. subsp. lucida (E. Vilm. ex Gay) Staudt	CFRA 366	PI 551734	California, USA	NCGR
F. chiloensis (L.) Mill. subsp. chiloensis f. chiloensis	CFRA 742	PI 552037	Los Lagos, Chile	NCGR
F. virginiana Mill. subsp. virginiana	CFRA 67	PI 452436	Maryland, USA	NCGR
F. virginiana Mill. subsp. glauca (S. Watson) Staudt
Decaploid
F. iturupensis Staudt	CFRA 1841	PI641091	Iturup Island, Russian Federation	NCGR
Outgroup
D. fruticosa (L.) Rydb.	D. fruticosa		New Hampshire, USA	T. Davis
